# Supplementary material
Source: publisher figshare collection journal article supplement (https://acs.figshare.com/ndownloader/files/26011141)
Supplement: Supplementary file 1 [file 26011141]

## Sheet: Key
Table S1: List of altered Proteins from published research articles
S1.1.	List of significantly altered proteins from the published research articles
S1.2.	List of affected pathways from the literarure based significantly altered proteins
S1.3.	List of Enrichment analysis from the literarure based significantly altered proteins

## Sheet: S1.1. Altered proteins
Table S1.1. List of altered proteins from published research articles
S.no.	Gene ID	Uniprot ID	Description	Length	Alteration
1	IFNG	P01579	Interferon gamma	166	Up
2	C8A	P07357	Complement component C8 alpha chain	584	Up
3	CRP	P02741	C-reactive protein	224	Up
4	CXCL10	P02778	C-X-C motif chemokine 10	98	Up
5	IL21	Q9HBE4	Interleukin-21	162	Up
6	IL20	Q9NYY1	Interleukin-20	176	Up
7	CCL2	P13500	C-C motif chemokine 2	99	Up
8	CCL27	Q9Y4X3	C-C motif chemokine 27	112	Up
9	C1S	P09871	Complement C1s subcomponent	688	Up
10	C5	P01031	Complement C5	1676	Up
11	HYOU1	Q9Y4L1	Hypoxia up-regulated protein 1	999	Up
12	CREB3L3	Q68CJ9	Cyclic AMP-responsive element-bindi...	461	Up
13	CPN1	Q99829	Copine-1	537	Up
14	AKT1	P31749	RAC-alpha serine/threonine-protein ...	480	Up
15	CFB	P00751	Complement factor B	764	Up
16	HP	P00738	Haptoglobin	406	Up
17	CKM	P06732	Creatine kinase M-type	381	Up
18	CXCL8	P10145	Interleukin-8	99	Up
19	CPN1	P15169	Carboxypeptidase N catalytic chain	458	Up
20	CFH	P08603	Complement factor H	1231	Up
21	CFP	P27918	Properdin	469	Up
22	CD274	Q9NZQ7	Programmed cell death 1 ligand 1	290	Up
23	APC	P25054	Adenomatous polyposis coli protein	2843	Up
24	C1R	P00736	Complement C1r subcomponent	705	Up
25	AZU1	P20160	Azurocidin	251	Up
26	IL20	Q9UHF5	Interleukin-17B	180	Up
27	CEACAM1	P13688	Carcinoembryonic antigen-related ce...	526	Up
28	CXCR1	P25024	C-X-C chemokine receptor type 1	350	Up
29	IL6	P05231	Interleukin-6	212	Up
30	LBP	P18428	Lipopolysaccharide-binding protein	481	Up
31	LGALS3BP	Q08380	Galectin-3-binding protein	585	Up
32	MMP25	Q9H239	Matrix metalloproteinase-28	520	Up
33	MMP25	Q9NPA2	Matrix metalloproteinase-25	562	Up
34	p53	P04637	Cellular tumor antigen p53	393	Up
35	PRG3	Q8TBJ4	Phospholipid phosphatase-related pr...	325	Up
36	PRG3	Q9BRQ8	Ferroptosis suppressor protein 1	373	Up
37	PRG3	Q9Y2Y8	Proteoglycan 3	225	Up
38	Siglec5	O15389	Sialic acid-binding Ig-like lectin ...	551	Up
39	STAT3	P40763	Signal transducer and activator of ...	770	Up
40	CTSG	P08311	Cathepsin G	255	Down
41	DEFA1	P59665	Neutrophil defensin 1	94	Down
42	CXCR2	P25025	C-X-C chemokine receptor type 2	360	Down
43	ELANE	P08246	Neutrophil elastase	267	Down
44	LRG1	P02750	Leucine-rich alpha-2-glycoprotein	347	Down
45	MPO	P05164	Myeloperoxidase	745	Down
46	NRGN	Q92686	Neurogranin	78	Down
47	PRTN3	P24158	Myeloblastin	256	Down
48	SAA1	P0DJI8	Serum amyloid A-1 protein	122	Down
49	SAA2	P0DJI9	Serum amyloid A-2 proteincur	122	Down
50	SERPIND1	P05546	Heparin cofactor 2	499	Down
51	TRAF6	Q9Y4K3	TNF receptor-associated factor 6	522	Down
52	UMOD	P07911	Uromodulin	640	Down
53	IGHG1	P01857	Immunoglobulin heavy constant gamma...	330	Down
54	HLA-DRB4	P13762	HLA class II histocompatibility ant...	266	Down
55	C6	P13671	Complement component C6	934	Down
56	C1QBP	Q07021	Complement component 1 Q subcompone...	282	Down
57	CARD11	Q9BXL7	Caspase recruitment domain-containi...	1154	Down
58	FYN	P06241	Tyrosine-protein kinase Fyn	537	Down
59	CD276	Q5ZPR3	CD276 antigen	534	Down
60	HLA-DRB1	P01911	HLA class II histocompatibility ant...	266	Down
61	CD177	Q8N6Q3	CD177 antigen	437	Down
62	BTN3A1	O00481	Butyrophilin subfamily 3 member A1	513	Down
63	HLA-DRA	P01903	HLA class II histocompatibility ant...	254	Down
64	CD247	P20963	T-cell surface glycoprotein CD3 zet...	164	Down
65	CD8b	P10966	T-cell surface glycoprotein CD8 bet...	210	Down
66	HBD	P02042	Hemoglobin subunit delta	147	Down
67	IGLL1	P15814	Immunoglobulin lambda-like polypept...	213	Down
68	CD2	P06729	T-cell surface antigen CD2	351	Down
69	HLA-DRB5	Q30154	HLA class II histocompatibility ant...	266	Down
70	CD3g	P09693	T-cell surface glycoprotein CD3 gam...	182	Down
71	CD4	P01730	T-cell surface glycoprotein CD4	458	Down
72	HRG	P04196	Histidine-rich glycoprotein	525	Down
73	IGHE	P01854	Immunoglobulin heavy constant epsil...	428	Down
74	IGLC2	P0DOY2	Immunoglobulin lambda constant 2	106	Down
75	GP1BA	P07359	Platelet glycoprotein Ib alpha chai...	652	Down
76	CD8a	P01732	T-cell surface glycoprotein CD8 alp...	235	Down
77	CD3e	P07766	T-cell surface glycoprotein CD3 eps...	207	Down
78	IGHG2	P01859	Immunoglobulin heavy constant gamma...	326	Down
79	IGHG4	P01861	Immunoglobulin heavy constant gamma...	327	Down
80	LCK	P06239	Tyrosine-protein kinase Lck	509	Down
81	PF4	P02776	Platelet factor 4	101	Down
82	RAC1	P63000	Ras-related C3 botulinum toxin subs...	192	Down
83	SERPINA5	P05154	Plasma serine protease inhibitor	406	Down
84	SKAP1	Q86WV1	Src kinase-associated phosphoprotei...	359	Down
85	TRAC	P01848	T cell receptor alpha chain constan...	140	Down
86	TRBC1	P01850	T cell receptor beta constant 1	176	Down
87	TYROBP	O43914	TYRO protein tyrosine kinase-bindin...	113	Down
88	ZAP70	P43403	Tyrosine-protein kinase ZAP-70	619	Down

## Sheet: S1.2. Altered Pathways
Table S1.2. List of affected pathways from the literarure based significantly altered proteins
S.no.	Protein class	Contribution	Contribution percentage
1	Apoptosis signaling pathway	2	0.0238095
2	Integrin signalling pathway	2	0.0238095
3	Wnt signaling pathway	2	0.0238095
4	FGF signaling pathway	2	0.0238095
6	Angiogenesis	3	0.0357143
8	EGF receptor signaling pathway	3	0.0357143
5	Blood coagulation	4	0.047619
9	Axon guidance	4	0.047619
7	Ras-MAPK pathway	5	0.0595238
10	CCKR signaling map	5	0.0595238
11	Interleukin signaling pathway	7	0.0833333
12	p53 pathway	8	0.0952381
14	Miscelleanous pathways	17	0.202381
13	Immune system stimulating pathway	20	0.238095
Immune system stimulating pathway
1	T cell activation	8	0.0952381
2	Inflammation mediated by chemokine and cytokine signaling pathway	12	0.142857
Ras-MAPK pathway
1	p38 MAPK pathway	2	0.0238095
2	Ras Pathway	3	0.0357143
Miscelleanous pathways
1	JAK/STAT signaling pathway	1	0.012
2	Interferon-gamma signaling pathway	1	0.012
3	Insulin/IGF pathway-protein kinase B signaling cascade	1	0.012
4	Hypoxia response via HIF activation	1	0.012
5	Heterotrimeric G-protein signaling pathway-Gi alpha and Gs alpha mediated pathway	1	0.012
6	Transcription regulation by bZIP transcription factor	1	0.012
7	Toll receptor signaling pathway	1	0.012
8	FAS signaling pathway	1	0.012
9	Endothelin signaling pathway	1	0.012
10	Cytoskeletal regulation by Rho GTPase	1	0.012
11	PI3 kinase pathway	1	0.012
12	PDGF signaling pathway	1	0.012
13	Cadherin signaling pathway	1	0.012
14	B cell activation	1	0.012

## Sheet: S1.3. Protein group enrichment
Table S1.3. List of Enrichment analysis from the literarure based significantly altered proteins
S.no.	Protein class	Contribution	Contribution percentage
1	Protein modifying enzyme	10	0.204
2	Scaffold/adaptor/cell adhesion protein	2	0.061
3	Protein-binding activity modulator	5	0.102
4	Transmembrane signal receptor	1	0.14
5	Defense/immunity protein	18	0.367
6	Gene-specific transcriptional regulator	2	0.041
7	Metabolite interconversion enzyme	4	0.082
